# Supplementary material for: Efficacy and Safety of 5-Day Oral Ensitrelvir for Patients With Mild to Moderate COVID-19: The SCORPIO-SR Randomized Clinical Trial
Source: PubMed Central journal article supplement — JAMA Netw Open. 2024 Feb 9;7(2):e2354991. doi: 10.1001/jamanetworkopen.2023.54991 (PMC10858401; doi:10.1001/jamanetworkopen.2023.54991), 2024-02-09
Supplement: jamanetwopen-e2354991-s002.pdf [file jamanetwopen-e2354991-s002.pdf]

## Supplementary Online Content

Yotsuyanagi H, Ohmagari N, Doi Y, et al. Efficacy and safety of 5-day oral ensitrelvir for patients with mild to moderate COVID-19: the SCORPIO-SR randomized clinical trial. *JAMA Netw Open*. 2024;7(2):e2354991. doi:10.1001/jamanetworkopen.2023.54991

**eAppendix.** List of Investigators

**eMethods.** Supplementary Methods

**eFigure 1.** Time to First Negative SARS-CoV-2 Viral Titer (Modified Intention-to-Treat Population)

**eFigure 2.** SARS-CoV-2 Viral RNA Levels up to Day 21 (Intention-to-Treat Population)

**eFigure 3.** SARS-CoV-2 Viral Titer up to Day 21 (Modified Intention-to-Treat Population)

**eFigure 4.** Levels of HDL Cholesterol, Triglycerides, Total Bilirubin, and Iron (Safety Analysis Population)

**eTable 1.** Demographic and Clinical Characteristics of the Patients at Baseline (Safety Analysis Population)

**eTable 2.** Representativeness of Trial Participants

**eTable 3.** Details of Risk Factors for Severe Disease at Baseline (Intention-to-Treat Population)

**eTable 4.** Change from Baseline to Day 4 in SARS-CoV-2 Viral RNA Levels, Time to Resolution of the 12 COVID-19 Symptoms, and Time to Resolution of the 14 COVID-19 Symptoms (Intention-to-Treat Population, Patients Randomized Within 120 Hours of Disease Onset)

**eTable 5.** Outcomes of Treatment-Related Adverse Events (Safety Analysis Population)

This supplementary material has been provided by the authors to give readers additional information about their work.

## e Appendix. List of Investigators

The following investigators participated in the SCORPIO-SR study and enrolled at least 1 patient.

| Name                | Institute                                                                 | Location                       |
|---------------------|---------------------------------------------------------------------------|--------------------------------|
| <b>Japan</b>        |                                                                           |                                |
| Fujii, Shigeru      | Fukuoka Shinmizumaki Hospital                                             | Onga-gun, Fukuoka, Japan       |
| Fujimaki, Yutaka    | Fujimaki Ent Clinic                                                       | Ichikawa City, Chiba, Japan    |
| Fukuda, Akira       | Tokyo Metropolitan Toshima Hospital                                       | Itabashi-ku, Tokyo, Japan      |
| Furuichi, Motohiko  | Edogawa Medicare Hospital                                                 | Edogawa-ku, Tokyo, Japan       |
| Haji, Yoichiro      | Kojunkai Daido Medicine                                                   | Nagoya City, Aichi, Japan      |
| Harada, Toshiyuki   | Japan Community Health care Organization Hokkaido Hospital                | Sapporo City, Hokkaido, Japan  |
| Hayashi, Masamichi  | Fujita Health University Okazaki Medical Center                           | Okazaki City, Aichi, Japan     |
| Hayashi, Shinichiro | Medical Corporation Kouhoukai Takagi Hospital                             | Okawa City, Fukuoka, Japan     |
| Hirai, Yuji         | Tokyo Medical University Hachioji Medical Center                          | Hachioji City, Tokyo, Japan    |
| Hori, Takaki        | Kamagaya General Hospital                                                 | Kamagaya City, Chiba, Japan    |
| Igarashi, Tomofumi  | Social Medical Corporation Keiwakai Nishioka Hospital                     | Sapporo City, Hokkaido, Japan  |
| Kamezawa, Takashi   | Kamezawa Clinic                                                           | Kasugai City, Aichi, Japan     |
| Kamiya, Uguri       | Kaiseikai Kita Shin Yokohama Internal Medicine Clinic                     | Yokohama City, Kanagawa, Japan |
| Kaneda, Satoru      | National Hospital Organization Chiba Medical Center                       | Chiba City, Chiba, Japan       |
| Kasamatsu, Yu       | University Hospital Kyoto Prefectural University of Medicine              | Kyoto City, Kyoto, Japan       |
| Kawamura, Naohisa   | Japan Organization of Occupational Health and Safety Osaka Rosai Hospital | Sakai City, Osaka, Japan       |
| Kisohara, Akira     | Kasukabe Medical Center                                                   | Kasukabe City, Saitama, Japan  |
| Kodaira, Makoto     | Kodaira Hospital                                                          | Toda City, Saitama, Japan      |
| Konno, Satoshi      | Hokkaido University Hospital                                              | Sapporo City, Hokkaido, Japan  |
| Lee, Woon Joo       | Lee's Clinic                                                              | Osaka City, Osaka, Japan       |
| Matono, Takashi     | Aso Iizuka Hospital                                                       | Iizuka City, Fukuoka, Japan    |
| Murayama, Masanori  | Matsunami General Hospital                                                | Hashima-gun, Gifu, Japan       |
| Nakagawa, Hidemitsu | Nozaki Tokushukai Hospital                                                | Daito City, Osaka, Japan       |
| Nakamura, Fukumi    | Tokyo Metropolitan Bokutoh Hospital                                       | Sumida-ku, Tokyo, Japan        |
| Nozaki, Minoru      | Swing NOZAKI Clinic                                                       | Musashino City, Tokyo, Japan   |
| Ogata, Tomoyuki     | JA Toride Medical Center                                                  | Toride City, Ibaraki, Japan    |
| Ogihara, Shoji      | Takinogawa Hospital                                                       | Kita-ku, Tokyo, Japan          |
| Ohmagari, Norio     | Center Hospital of the National Center for Global Health and Medicine     | Shinjuku-ku, Tokyo, Japan      |
| Ono, Ryuta          | Kanagawa Himawari Clinic                                                  | Kawasaki City, Kanagawa, Japan |
| Ota, Kazue          | Minna no Tennocho Clinic                                                  | Yokohama City, Kanagawa, Japan |
| Ota, Kazue          | Yaguchi Midori Clinic                                                     | Ota-ku, Tokyo, Japan           |
| Owan, Isoko         | National Hospital Organization Okinawa National Hospital                  | Ginowan City, Okinawa, Japan   |
| Sagara, Hironori    | SHOWA University East Hospital                                            | Shinagawa-ku, Tokyo, Japan     |
| Shimizu, Hidefumi   | Japan Community Health care Organization Tokyo Shinjuku Medical Center    | Shinjuku-ku, Tokyo, Japan      |
| Shimizu, Masatoshi  | National Hospital Organization Kobe Medical Center                        | Kobe City, Hyogo, Japan        |
| Suzuki, Hiromichi   | University of Tsukuba Hospital                                            | Tsukuba City, Ibaraki, Japan   |

|                    |                                                                |                                        |
|--------------------|----------------------------------------------------------------|----------------------------------------|
| Tachikawa, Natsuo  | Yokohama Municipal Citizen's Hospital                          | Yokohama City, Kanagawa, Japan         |
| Tajima, Yasuhisa   | Hamamatsu Medical Center                                       | Hamamatsu City, Shizuoka, Japan        |
| Takahashi, Satoshi | Sapporo Medical University Hospital                            | Sapporo City, Hokkaido, Japan          |
| Tashiro, Naotaka   | Tashiro Thyroid Clinic                                         | Fukuoka City, Fukuoka, Japan           |
| Tsushima, Kenji    | IUHW Narita Hospital                                           | Narita City, Chiba, Japan              |
| Umezawa, Yoshihiro | Den-en-chofu Family Clinic                                     | Ota-ku, Tokyo, Japan                   |
| Yada, Shinichiro   | Onga Nakama Medical Association Onga Hospital                  | Onga-gun, Fukuoka, Japan               |
| Yamada, Kota       | Tsuchiura Beryl Clinic                                         | Tsuchiura City, Ibaraki, Japan         |
| Yamato, Masaya     | Rinku General Medical Center                                   | Izumisano City, Osaka, Japan           |
| Yamato, Tsuyoshi   | Kouwakai Kouwa Clinic                                          | Toshima-ku, Tokyo, Japan               |
| <b>Vietnam</b>     |                                                                |                                        |
| Do, Van Dung       | University of Medicine and Pharmacy at Ho Chi Minh city        | District 5, Ho Chi Minh city, Vietnam  |
| Pham, Thi Van Anh  | Hanoi Medical University                                       | Dong Da District, Hanoi, Vietnam       |
| <b>South Korea</b> |                                                                |                                        |
| Cha, Bongki        | Chung-Ang University Health Care System Hyundai Hospital       | Namyangju-si, Gyeonggi-do, South Korea |
| Han, Sang Hoon     | Gangnam Severance Hospital                                     | Gangnam-gu, Seoul, South Korea         |
| Heo, Eun Young     | SMG-SNU Boramae Medical Center                                 | Dongjak-gu, Seoul, South Korea         |
| Kang, Yumin        | Myongji Hospital                                               | Goyang-si, Gyeonggi-do, South Korea    |
| Kwak, Yee Gyung    | Inje University Ilsan Paik Hospital                            | Goyang-si, Gyeonggi-do, South Korea    |
| Lee, Eung Gu       | The Catholic University of Korea Bucheon St. Mary's Hospital   | Bucheon-si, Gyeonggi-do, South Korea   |
| Lee, Heayon        | The Catholic University of Korea Eunpyeong St. Mary's Hospital | Eunpyeong-gu, Seoul, South Korea       |
| Lee, Jin Soo       | Inha University Hospital                                       | Jung-gu, Incheon, South Korea          |
| Lee, Mi Suk        | Kyung Hee University Medical Center                            | Dongdaemun-gu, Seoul, South Korea      |
| Park, Jinsik       | Incheon Sejong Hospital                                        | Gyeyang-gu, Incheon, South Korea       |
| Park, Seong Yeon   | Dongguk University Ilsan Hospital                              | Goyang-si, Gyeonggi-do, South Korea    |
| Park, Yoon Soo     | Yongin Severance Hospital                                      | Yongin-si, Gyeonggi-do, South Korea    |
| Shi, Hye Jin       | Gachon University Gil Medical Center                           | Namdong-gu, Incheon, South Korea       |

## eMethods

### Inclusion and Exclusion Criteria

Patients aged 12 to <70 years who tested positive for severe acute respiratory syndrome coronavirus 2 (SARS-CoV-2) within 120 hours prior to randomization and had a time from the onset of coronavirus disease 2019 (COVID-19) symptom (at least 1 of the 14 symptoms listed in “COVID-19 Symptom Scores” below) to randomization of 120 hours or less were eligible for study enrollment. SARS-CoV-2 tests were performed using a nucleic acid detection test using a nasopharyngeal swab, nasal swab, or saliva (qualitative/quantitative reverse transcription-polymerase chain reaction [RT-PCR] test or an isothermal nucleic acid amplification method [e.g., the loop-mediated isothermal amplification method or the transcription-mediated amplification method]); a quantitative antigen test using a nasopharyngeal swab, nasal swab, or saliva; or a qualitative antigen test using a nasopharyngeal or nasal swab. To avoid excessive drug exposure, patients aged <18 years should have recorded a body weight of  $\geq 40$  kg at enrollment. Patients with mild to moderate COVID-19 were defined as those who have had at least 1 moderate or severe symptom among the 12 COVID-19 symptoms at enrollment (excluding symptoms present prior to COVID-19 onset) or those who have at least 1 moderate or severe existing symptom or symptoms presenting prior to COVID-19 onset that was considered to have worsened at baseline (refer to “COVID-19 Symptom Scores” below for the details of symptom severity assessments).

The key exclusion criteria included the following: an awake oxygen saturation of  $\leq 93\%$  (room air); supplemental oxygen requirement; anticipated COVID-19 exacerbation within 48 hours of randomization in the opinion of the investigator; suspected active and systemic infections other than COVID-19 requiring treatment; current or chronic history of moderate or severe liver disease, known hepatic or biliary abnormalities (except for Gilbert’s syndrome or asymptomatic gallstones), or moderate-to-severe kidney disease; pregnancy, possible pregnancy, or lactation; and blood donation ( $\geq 400$  mL within 12 weeks or  $\geq 200$  mL within 4 weeks prior to enrollment). Patients who had used drugs for SARS-CoV-2 infection within 7 days prior to randomization, a strong cytochrome P450, family 3, subfamily A (CYP3A) inhibitor or inducer within 14 days prior to randomization, or St. John’s wort products within 14 days prior to randomization were also excluded.

### COVID-19 Symptom Scores

| Symptom                                        | Symptom rating                                                    | 5 symptoms | 12 symptoms | 14 symptoms |
|------------------------------------------------|-------------------------------------------------------------------|------------|-------------|-------------|
| 1. Stuffy or runny nose                        | None=0<br>Mild=1<br>Moderate=2<br>Severe=3                        | ●          | ●           | ●           |
| 2. Sore throat                                 |                                                                   | ●          | ●           | ●           |
| 3. Shortness of breath (difficulty breathing)  |                                                                   |            | ●           | ●           |
| 4. Cough                                       |                                                                   | ●          | ●           | ●           |
| 5. Low energy or tiredness                     |                                                                   | ●          | ●           | ●           |
| 6. Muscle or body aches                        |                                                                   |            | ●           | ●           |
| 7. Headache                                    |                                                                   |            | ●           | ●           |
| 8. Chills or shivering                         |                                                                   |            | ●           | ●           |
| 9. Feeling hot or feverish                     |                                                                   | ●          | ●           | ●           |
| 10. Nausea (feeling like you want to throw up) |                                                                   |            | ●           | ●           |
| 11. Vomiting (throwing up)                     |                                                                   |            | ●           | ●           |
| 12. Diarrhea (loose or watery stools)          |                                                                   |            | ●           | ●           |
| 13. Sense of smell                             | Same as usual=0<br>Less than usual=1<br>No sense of smell/taste=2 |            |             | ●           |
| 14. Sense of taste                             |                                                                   |            |             | ●           |

### Treatment

Patients received an oral once-daily dosage of ensitrelvir 125 mg, ensitrelvir 250 mg, or matching placebo tablets. Two types of matching placebo tablets were used: placebo-B, which was identical in appearance and packaging to ensitrelvir 125 mg, and placebo-D, which was identical in appearance and packaging to ensitrelvir 250 mg. Patients randomized to the 125-mg ensitrelvir group received 3 tablets of ensitrelvir 125 mg (i.e., 375 mg in total as a loading dose) and 3 placebo-D tablets on day 1. On days 2 to 5, 1 tablet each of ensitrelvir 125 mg and placebo-D was administered. Similarly, patients randomized to the 250-mg ensitrelvir group received 3

tablets of ensitrelvir 250 mg (i.e., 750 mg in total as a loading dose) and 3 placebo-B tablets on day 1, followed by 1 tablet each of ensitrelvir 250 mg and placebo-B administered on days 2 to 5. Patients assigned to the placebo group received 3 tablets each of placebo-D and placebo-B on day 1, followed by 1 tablet each of placebo-D and placebo-B administered on days 2 to 5. In view of the CYP3A inhibitory effect of ensitrelvir, intake of any foods or beverages containing grapefruit or Seville oranges or use of St. John's wort products was prohibited until day 5.

## **Study Assessments**

### ***COVID-19 Symptom Assessments***

Patients self-assessed the severity of 14 COVID-19 symptoms (refer to “COVID-19 Symptom Scores” above) twice daily, in the morning and evening, on days 1 to 9 and once daily in the evening from days 10 to 21. Symptom assessments were postponed until 4 hours after drug administration in patients taking acetaminophen for antipyretic or analgesic purposes. The time to resolution of the 5 COVID-19 symptoms was defined as the time from the start of the study intervention to the resolution of all 5 symptoms. Patients were considered to have achieved the primary end point if all 5 symptoms remained resolved for  $\geq 24$  hours. Resolution of symptoms was defined as follows: (1) for pre-existing symptoms that were present before the onset of COVID-19 and considered by the patient to have worsened at baseline, severe symptoms at baseline must have improved to moderate or better, moderate symptoms at baseline must have improved to mild or better, and mild symptoms at baseline must have remained mild or better (no symptoms) and (2) for pre-existing symptoms that were present before the onset of COVID-19 and considered by the patient not to have worsened at baseline, severe symptoms at baseline must have remained severe or improved, moderate symptoms at baseline must have remained moderate or improved, and mild symptoms at baseline must have remained mild or better (no symptoms). Symptoms other than those mentioned above (those not occurring before the onset of COVID-19 or those that occur at or after baseline) must have been completely resolved. The time to resolution of the 12 and 14 COVID-19 symptoms was defined in a similar manner, i.e., the time from the start of the study intervention to the resolution of all the symptoms.

### ***Virologic Assessments***

Nasopharyngeal swabs collected from patients by the investigator or his/her designee were used to measure the SARS-CoV-2 viral RNA levels and viral titers. SARS-CoV-2 viral titers and viral RNA levels were centrally measured at ViroClinics (Rotterdam, Netherlands). RT-PCR tests were performed to determine the presence or absence of SARS-CoV-2 viral RNA.

### ***Safety Assessments***

In addition to the reporting of adverse events, laboratory tests, vital sign measurements, and electrocardiography were performed throughout the study period. Pregnancy tests were performed on women with childbearing potential on day 1 (before drug administration) and day 28 (or study discontinuation). Additional pregnancy tests were permitted at the discretion of the investigator. All safety data were evaluated by an independent Data and Safety Monitoring Board.

## **Statistical Analysis**

The primary end point (time to resolution of the 5 COVID-19 symptoms), key secondary end point 1 (change from baseline in SARS-CoV-2 viral RNA level on day 4), and other secondary end points (time to resolution of the 12 COVID-19 symptoms, time to resolution of the 14 COVID-19 symptoms, and SARS-CoV-2 viral RNA up to day 21) were assessed in the intention-to-treat population. The intention-to-treat population comprised all patients who tested positive for SARS-CoV-2 viral RNA at baseline, as confirmed by an RT-PCR test based on the nasopharyngeal swab sample. The key secondary end point 2 (time to first negative SARS-CoV-2 viral titer) and other secondary end points (SARS-CoV-2 viral titer up to day 21) were assessed in the modified intention-to-treat population. The modified intention-to-treat population comprised all patients who tested positive for SARS-CoV-2 viral RNA and who had detectable SARS-CoV-2 viral titer at baseline. All safety assessments were performed in the safety analysis population comprising all patients who received at least 1 ensitrelvir or placebo dose.

For the analyses in the primary analysis population (patients randomized in less than 72 hours of disease onset in the 125-mg ensitrelvir group), the time to resolution of the 5 COVID-19 symptoms was compared with the placebo group using a Peto-Prentice generalized Wilcoxon test stratified by SARS-CoV-2 vaccination history (yes or no). The change from baseline in the SARS-CoV-2 viral RNA level on day 4 was compared with that in the placebo group using an analysis of covariance (ANCOVA) model; baseline SARS-CoV-2 viral RNA and SARS-CoV-2 vaccination history (yes or no) were included as covariates. The time to the first negative SARS-

CoV-2 viral titer was compared with that of the placebo group using a log-rank test stratified by SARS-CoV-2 vaccination history (yes or no). All statistical comparisons were performed at a 2-sided significance level of .05. For the analyses of patients randomized within 120 hours of disease onset, the time from onset to randomization (<72 hours or  $\geq$ 72 hours) was added as a stratification factor or covariate.

# eFigure 1. Time to First Negative SARS-CoV-2 Viral Titer (Modified Intention-to-Treat Population)

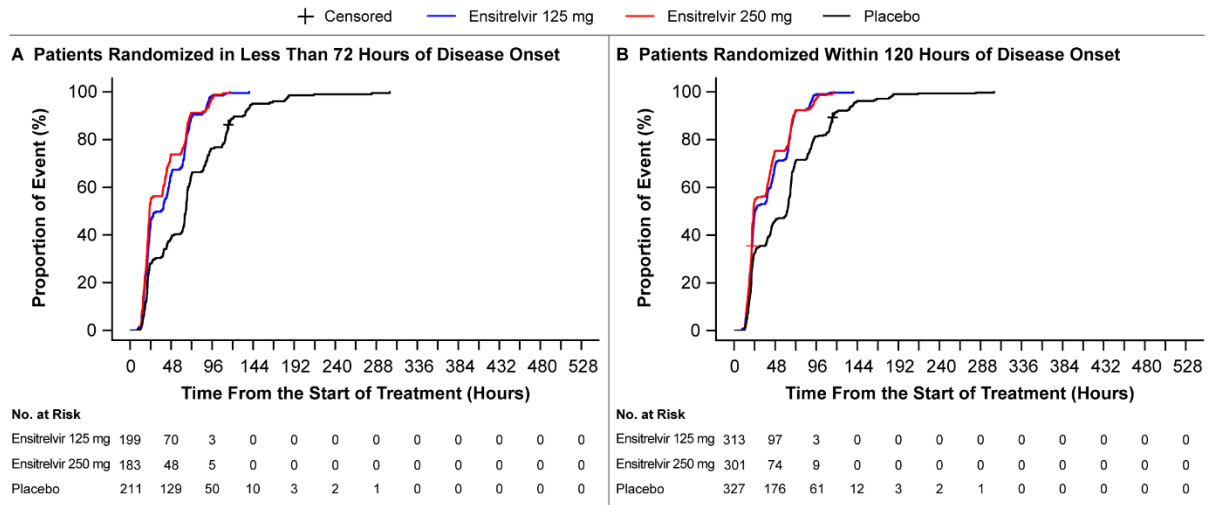

The analysis was performed for all patients who tested positive for SARS-CoV-2 viral RNA, with a detectable SARS-CoV-2 viral titer at baseline. Patients randomized in less than 72 hours of disease onset in the 125-mg ensitrelvir group were defined as the primary analysis population. A stratified log-rank test was applied to test the statistical significance vs placebo. The test was stratified by SARS-CoV-2 vaccination history (yes or no) for patients randomized in less than 72 hours (panel A) and time from onset to randomization (<72 hours or ≥72 hours) and SARS-CoV-2 vaccination history (yes or no) for patients randomized within 120 hours (panel B).

SARS-CoV-2, severe acute respiratory syndrome coronavirus 2.

## eFigure 2. SARS-CoV-2 Viral RNA Levels up to Day 21 (Intention-to-Treat Population)

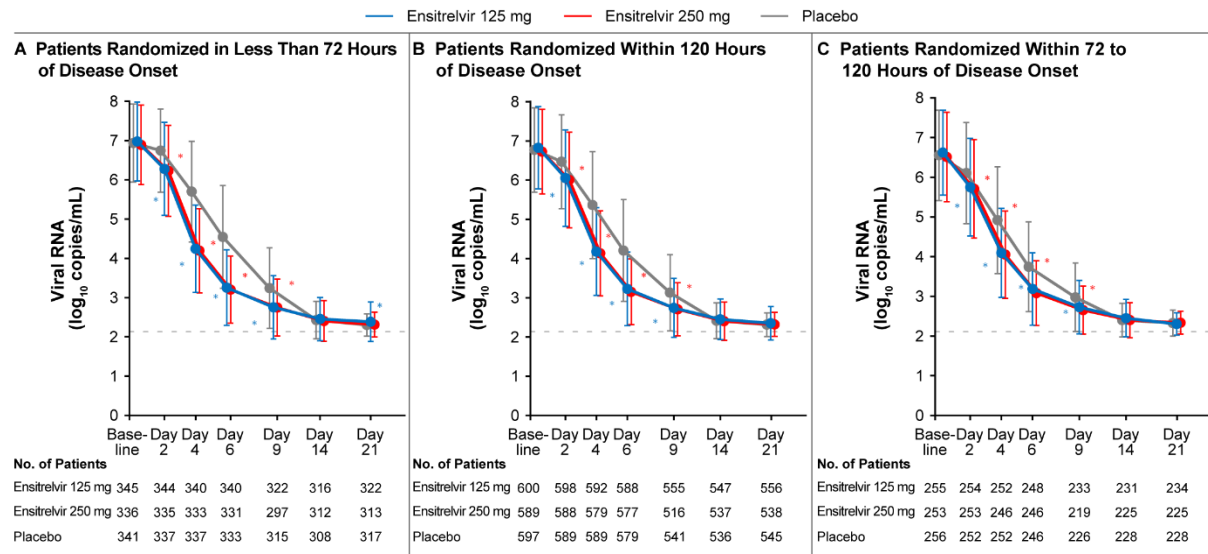

The analysis was performed for all patients who tested positive for SARS-CoV-2 viral RNA at baseline. Patients randomized in less than 72 hours of disease onset in the 125-mg ensitrelvir group were defined as the primary analysis population. The gray dotted line represents the LLOQ for SARS-CoV-2 viral RNA (2.08 log<sub>10</sub> copies/mL). A viral RNA level lower than the LLOD (negative viral RNA) and that lower than the LLOQ were imputed as 2.27 (lower limit of 95% detection) and 2.08 log<sub>10</sub> copies/mL, respectively. The covariates used for ANCOVA are baseline SARS-CoV-2 viral RNA and SARS-CoV-2 vaccination history (yes or no) for patients randomized in less than 72 hours (panel A); baseline SARS-CoV-2 viral RNA, time from onset to randomization (<72 hours or ≥72 hours), and SARS-CoV-2 vaccination history (yes or no) for patients randomized within 120 hours (panel B); and baseline SARS-CoV-2 viral RNA and SARS-CoV-2 vaccination history (yes or no) for patients randomized within 72 to 120 hours (panel C).

\* P value (ANCOVA) < .05.

ANCOVA, analysis of covariance; LLOD, lower limit of detection; LLOQ, lower limit of quantification; SARS-CoV-2, severe acute respiratory syndrome coronavirus 2.



### eFigure 3. SARS-CoV-2 Viral Titer up to Day 21 (Modified Intention-to-Treat Population)

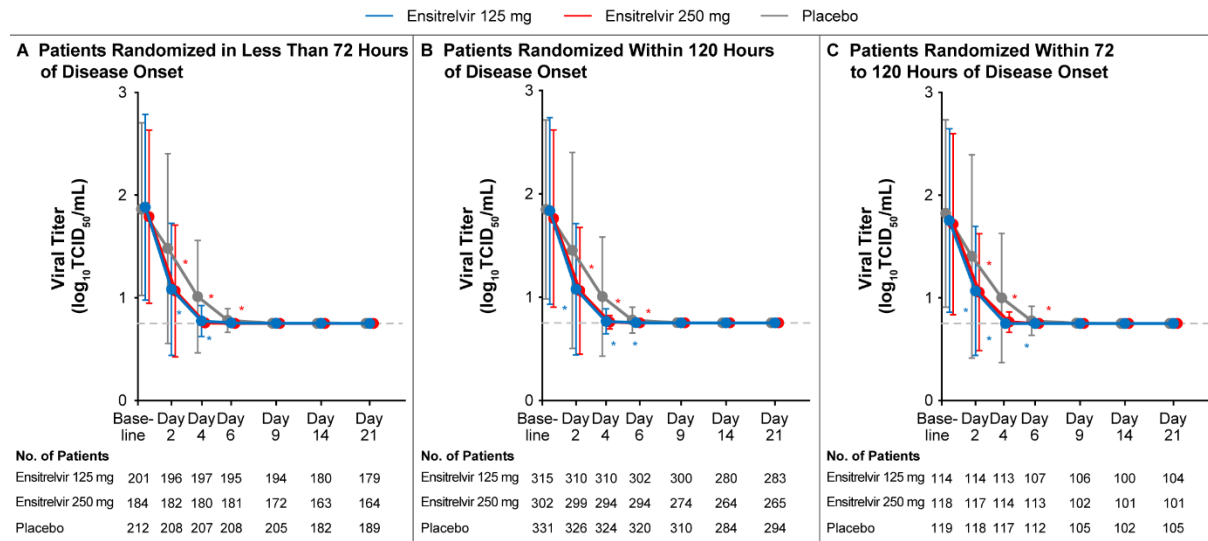

The analysis was performed for all patients who tested positive for SARS-CoV-2 viral RNA, with a detectable SARS-CoV-2 viral titer at baseline. Patients randomized in less than 72 hours of disease onset in the 125-mg ensitrelvir group were defined as the primary analysis population. The gray dotted line represents the LLOD for SARS-CoV-2 viral titer ( $0.75 \log_{10} \text{TCID}_{50}/\text{mL}$ ). A viral titer lower than the LLOD (negative viral titer) and that lower than the LLOQ were imputed as 0.75 (LLOD) and 1.0 (LLOQ)  $\log_{10} \text{TCID}_{50}/\text{mL}$ , respectively. The covariates used for ANCOVA are baseline SARS-CoV-2 viral titer and SARS-CoV-2 vaccination history (yes or no) for patients randomized in less than 72 hours (panel A); baseline SARS-CoV-2 viral titer, time from onset to randomization (<72 hours or  $\geq 72$  hours), and SARS-CoV-2 vaccination history (yes or no) for patients randomized within 120 hours (panel B); and SARS-CoV-2 vaccination history (yes or no) for patients randomized within 72 to 120 hours (panel C). \* P value (ANCOVA) < .05.

ANCOVA, analysis of covariance; LLOD, lower limit of detection; LLOQ, lower limit of quantification; SARS-CoV-2, severe acute respiratory syndrome coronavirus 2;  $\text{TCID}_{50}$ , 50% tissue culture infectious dose.

**eFigure 4. Levels of HDL Cholesterol, Triglycerides, Total Bilirubin, and Iron (Safety Analysis Population)**

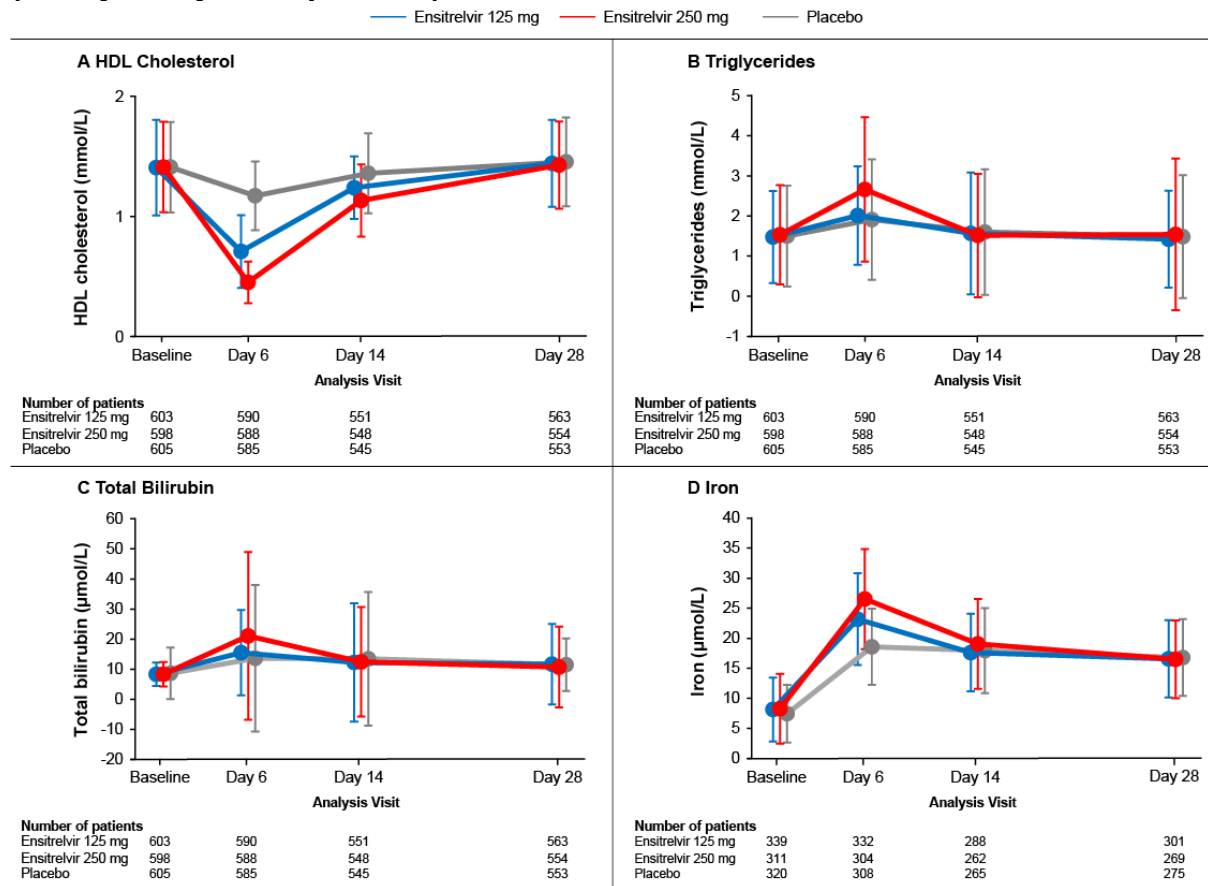

The analysis was performed for all patients who received at least 1 ensitrelvir or placebo dose. HDL, high-density lipoprotein.

**eTable 1. Demographic and Clinical Characteristics of the Patients at Baseline (Safety Analysis Population)**

| <b>Characteristic</b>                     | <b>Ensitrelvir,<br/>125 mg<br/>(n = 604)</b> | <b>Ensitrelvir,<br/>250 mg<br/>(n = 599)</b> | <b>Placebo<br/>(n = 605)</b> |
|-------------------------------------------|----------------------------------------------|----------------------------------------------|------------------------------|
| Male sex — no. (%)                        | 319 (52.8)                                   | 325 (54.3)                                   | 311 (51.4)                   |
| Female sex — no. (%)                      | 285 (47.2)                                   | 274 (45.7)                                   | 294 (48.6)                   |
| Mean (SD) age — years                     | 36.0 (12.6)                                  | 35.9 (12.7)                                  | 35.3 (12.6)                  |
| Asian race — no. (%)                      | 602 (99.7)                                   | 597 (99.7)                                   | 603 (99.7)                   |
| COVID-19 vaccination history —<br>no. (%) |                                              |                                              |                              |
| ≥1 vaccination                            | 562 (93.0)                                   | 555 (92.7)                                   | 558 (92.2)                   |
| ≥2 vaccinations                           | 554 (91.7)                                   | 551 (92.0)                                   | 549 (90.7)                   |
| ≥3 vaccinations                           | 286 (47.4)                                   | 295 (49.2)                                   | 288 (47.6)                   |
| Prior acetaminophen use — no.<br>(%)      | 216 (35.8)                                   | 194 (32.4)                                   | 209 (34.5)                   |

Data for all patients who received at least 1 ensitrelvir or placebo dose are shown.  
COVID-19, coronavirus disease 2019; SD, standard deviation.

**eTable 2. Representativeness of Trial Participants**

|                                          |                                                                                                                                                                                                                                                                                                                                                                                                                                                                                                                                                                                                                                                                                                                                                                                                                                                                                                                                                                                                                                                                                                                                                                                                                                                            |
|------------------------------------------|------------------------------------------------------------------------------------------------------------------------------------------------------------------------------------------------------------------------------------------------------------------------------------------------------------------------------------------------------------------------------------------------------------------------------------------------------------------------------------------------------------------------------------------------------------------------------------------------------------------------------------------------------------------------------------------------------------------------------------------------------------------------------------------------------------------------------------------------------------------------------------------------------------------------------------------------------------------------------------------------------------------------------------------------------------------------------------------------------------------------------------------------------------------------------------------------------------------------------------------------------------|
| <b>Disease under investigation</b>       | <b>COVID-19</b>                                                                                                                                                                                                                                                                                                                                                                                                                                                                                                                                                                                                                                                                                                                                                                                                                                                                                                                                                                                                                                                                                                                                                                                                                                            |
| Special considerations related to        |                                                                                                                                                                                                                                                                                                                                                                                                                                                                                                                                                                                                                                                                                                                                                                                                                                                                                                                                                                                                                                                                                                                                                                                                                                                            |
| Sex and gender                           | COVID-19 affects men and women with similar frequency. Data on gender identity and COVID-19 remain limited.                                                                                                                                                                                                                                                                                                                                                                                                                                                                                                                                                                                                                                                                                                                                                                                                                                                                                                                                                                                                                                                                                                                                                |
| Age                                      | In adults, the prevalence of COVID-19 is generally similar across age groups. The elderly population is at an increased risk of mortality.                                                                                                                                                                                                                                                                                                                                                                                                                                                                                                                                                                                                                                                                                                                                                                                                                                                                                                                                                                                                                                                                                                                 |
| Race or ethnic group                     | COVID-19 affects people of all races and ethnicities.                                                                                                                                                                                                                                                                                                                                                                                                                                                                                                                                                                                                                                                                                                                                                                                                                                                                                                                                                                                                                                                                                                                                                                                                      |
| Geography                                | The COVID-19 pandemic poses a global threat, and its clinical burden is not limited to a specific country or region.                                                                                                                                                                                                                                                                                                                                                                                                                                                                                                                                                                                                                                                                                                                                                                                                                                                                                                                                                                                                                                                                                                                                       |
| Other considerations                     | The characteristics of SARS-CoV-2 are highly variable among variants. Omicron, the circulating variant of concern as of January 2023, is characterized by disease of mild severity. However, immune-evasive Omicron subvariants are being newly identified globally. Despite the worldwide initiatives for vaccination against SARS-CoV-2 infection, the vaccination status greatly varies among regions; as of January 2023, South-East Asia is ranked third among the 6 global regions defined by the World Health Organization in terms of the number of persons fully vaccinated per 100 population. <sup>1</sup>                                                                                                                                                                                                                                                                                                                                                                                                                                                                                                                                                                                                                                      |
| Overall representativeness of this trial | The participants in the present trial demonstrated the expected ratio of men to women. Biologic sex was self-reported by trial participants, but gender identity was not collected as it was not a part of the regulatory or legal requirements for conducting clinical trials in participating countries. Approximately half of the patients were men across treatment groups. Patient age was approximately 35 years on average in all treatment groups. The present trial was designed to enroll patients from Japan, Vietnam, and South Korea; the trial participants were enrolled from these 3 countries (Japan [53%], Vietnam [38%], and South Korea [9%]). More than 87% of the participants were classified under “not Hispanic or Latino ethnicity,” and almost all patients were Asian. The present trial was conducted during the SARS-CoV-2 Omicron epidemic and designed to enroll patients with mild to moderate COVID-19 irrespective of risk factors for severe disease. A majority (>90%) of patients had received 2 or more doses of the SARS-CoV-2 vaccine, and >85% of the patients were infected with the Omicron BA.1 or BA.2 subvariant. Approximately 70% of the participants were those without risk factors for severe disease. |

COVID-19, coronavirus disease 2019; SARS-CoV-2, severe acute respiratory syndrome coronavirus 2.

1. World Health Organization. WHO Coronavirus (COVID-19) Dashboard: Situation by Region, Country, Territory & Area. <https://covid19.who.int/table>. Accessed June 15, 2023.

**eTable 3. Details of Risk Factors for Severe Disease at Baseline (Intention-to-Treat Population)**

| Characteristic                                                      | Patients randomized <72 h after disease onset    |                                     |                      | Patients randomized within 120 h after disease onset |                                     |                      |
|---------------------------------------------------------------------|--------------------------------------------------|-------------------------------------|----------------------|------------------------------------------------------|-------------------------------------|----------------------|
|                                                                     | Ensitrelvir,<br>125 mg<br>(n = 347) <sup>a</sup> | Ensitrelvir,<br>250 mg<br>(n = 340) | Placebo<br>(n = 343) | Ensitrelvir,<br>125 mg<br>(n = 603)                  | Ensitrelvir,<br>250 mg<br>(n = 595) | Placebo<br>(n = 600) |
| Patients with any risk factors —<br>no. (%)                         | 107 (30.8)                                       | 90 (26.5)                           | 89 (25.9)            | 174 (28.9)                                           | 167 (28.1)                          | 152 (25.3)           |
| Age ≥65 years                                                       | 2 (0.6)                                          | 2 (0.6)                             | 2 (0.6)              | 4 (0.7)                                              | 5 (0.8)                             | 7 (1.2)              |
| BMI ≥30 kg/m <sup>2</sup>                                           | 23 (6.6)                                         | 15 (4.4)                            | 12 (3.5)             | 34 (5.6)                                             | 32 (5.4)                            | 24 (4.0)             |
| Cancer                                                              | 0                                                | 3 (0.9)                             | 0                    | 1 (0.2)                                              | 3 (0.5)                             | 0                    |
| Cerebrovascular disease                                             | 0                                                | 0                                   | 0                    | 0                                                    | 0                                   | 0                    |
| Chronic kidney disease                                              | 0                                                | 0                                   | 0                    | 0                                                    | 0                                   | 0                    |
| Chronic lung disease                                                | 1 (0.3)                                          | 0                                   | 1 (0.3)              | 2 (0.3)                                              | 0                                   | 1 (0.2)              |
| Chronic liver disease                                               | 0                                                | 0                                   | 0                    | 0                                                    | 0                                   | 0                    |
| Cystic fibrosis                                                     | 0                                                | 0                                   | 0                    | 0                                                    | 0                                   | 0                    |
| Diabetes mellitus                                                   | 4 (1.2)                                          | 6 (1.8)                             | 5 (1.5)              | 7 (1.2)                                              | 8 (1.3)                             | 7 (1.2)              |
| Disabilities                                                        | 1 (0.3)                                          | 0                                   | 0                    | 2 (0.3)                                              | 0                                   | 0                    |
| Heart conditions                                                    | 0                                                | 2 (0.6)                             | 1 (0.3)              | 1 (0.2)                                              | 3 (0.5)                             | 2 (0.3)              |
| Hypertension                                                        | 22 (6.3)                                         | 10 (2.9)                            | 14 (4.1)             | 34 (5.6)                                             | 28 (4.7)                            | 20 (3.3)             |
| Dyslipidemia                                                        | 29 (8.4)                                         | 17 (5.0)                            | 26 (7.6)             | 36 (6.0)                                             | 32 (5.4)                            | 35 (5.8)             |
| Human immunodeficiency virus                                        | 0                                                | 0                                   | 0                    | 0                                                    | 0                                   | 0                    |
| Mental health disorders                                             | 2 (0.6)                                          | 1 (0.3)                             | 0                    | 4 (0.7)                                              | 4 (0.7)                             | 3 (0.5)              |
| Neurologic conditions                                               | 0                                                | 0                                   | 0                    | 0                                                    | 0                                   | 0                    |
| Primary immunodeficiencies                                          | 0                                                | 0                                   | 0                    | 0                                                    | 0                                   | 0                    |
| Smoking                                                             | 55 (15.9)                                        | 56 (16.5)                           | 48 (14.0)            | 94 (15.6)                                            | 98 (16.5)                           | 87 (14.5)            |
| Solid organ or hematopoietic<br>cell transplantation                | 0                                                | 0                                   | 0                    | 0                                                    | 0                                   | 0                    |
| Tuberculosis                                                        | 0                                                | 0                                   | 0                    | 0                                                    | 0                                   | 0                    |
| Use of corticosteroids or other<br>immunosuppressive<br>medications | 4 (1.2)                                          | 3 (0.9)                             | 3 (0.9)              | 5 (0.8)                                              | 3 (0.5)                             | 4 (0.7)              |

Data for all patients who tested positive for SARS-CoV-2 viral RNA at baseline are shown.

<sup>a</sup> Primary analysis population.

BMI, body mass index; SARS-CoV-2, severe acute respiratory syndrome coronavirus 2.

**eTable 4. Change from Baseline to Day 4 in SARS-CoV-2 Viral RNA Levels, Time to Resolution of 12 COVID-19 Symptoms, and Time to Resolution of 14 COVID-19 Symptoms (Intention-to-Treat Population, Patients Randomized Within 120 Hours of Disease Onset)**

| Variable                                                                 | Ensitrelvir, 125 mg<br>(n = 603) | Ensitrelvir, 250 mg<br>(n = 595) | Placebo<br>(n = 600)   |
|--------------------------------------------------------------------------|----------------------------------|----------------------------------|------------------------|
| Change from baseline to day 4 in SARS-CoV-2 viral RNA level <sup>a</sup> |                                  |                                  |                        |
| Patients, No.                                                            | 592                              | 579                              | 589                    |
| LS mean (SE) — log <sub>10</sub> copies/mL                               | -2.46 (0.06)                     | -2.46 (0.06)                     | -1.26 (0.06)           |
| Difference from placebo, LS mean (SE)                                    | -1.20 (0.06)                     | -1.20 (0.06)                     |                        |
| 95% CI                                                                   | -1.32 to -1.08                   | -1.32 to -1.08                   |                        |
| P value                                                                  | <.001                            | <.001                            |                        |
| Time to resolution of 12 COVID-19 symptoms <sup>b</sup>                  |                                  |                                  |                        |
| Patients, No.                                                            | 582                              | 577                              | 572                    |
| Median (95% CI) — h                                                      | 200.0 (179.2 to 241.3)           | 192.1 (180.2 to 231.1)           | 221.5 (192.2 to 246.5) |
| Difference from placebo, median (95% CI), h                              | -21.5 (-55.1 to 29.3)            | -29.4 (-59.1 to 19.8)            |                        |
| P value <sup>c</sup>                                                     | .76                              | .35                              |                        |
| Time to resolution of 14 COVID-19 symptoms <sup>d</sup>                  |                                  |                                  |                        |
| Patients, No.                                                            | 582                              | 577                              | 572                    |
| Median (95% CI) — h                                                      | 215.9 (187.9 to 246.0)           | 212.7 (183.9 to 246.9)           | 240.2 (206.3 to 266.5) |
| Difference from placebo, median (95% CI), h                              | -24.2 (-66.5 to 26.3)            | -27.4 (-69.4 to 27.1)            |                        |
| P value <sup>c</sup>                                                     | .46                              | .30                              |                        |

The analysis was performed for all patients who tested positive for SARS-CoV-2 viral RNA at baseline.

<sup>a</sup> Analysis of covariance using baseline SARS-CoV-2 viral RNA, time from onset to randomization (<72 hours or ≥72 hours), and SARS-CoV-2 vaccination history (yes or no) as covariates.

<sup>b</sup> Low energy or tiredness, muscle or body aches, headache, chills or shivering, feeling hot or feverish, stuffy or runny nose, sore throat, cough, shortness of breath (difficulty breathing), nausea, vomiting, and diarrhea.

<sup>c</sup> Based on a Peto-Prentice generalized Wilcoxon test stratified by time from onset to randomization (<72 hours or ≥72 hours) and SARS-CoV-2 vaccination history (yes or no).

<sup>d</sup> Low energy or tiredness, muscle or body aches, headache, chills or shivering, feeling hot or feverish, stuffy or runny nose, sore throat, cough, shortness of breath (difficulty breathing), nausea, vomiting, diarrhea, anosmia, and dysgeusia.

CI, confidence interval; COVID-19, coronavirus disease 2019; LS, least-squares; SARS-CoV-2, severe acute respiratory syndrome coronavirus 2; SE, standard error.

**eTable 5. Outcomes of Treatment-Related Adverse Events (Safety Analysis Population)**

| <b>Adverse event category</b>                               | <b>Ensitrelvir,<br/>125 mg<br/>(n = 604)</b> | <b>Ensitrelvir,<br/>250 mg<br/>(n = 599)</b> | <b>Placebo<br/>(N=605)</b> |
|-------------------------------------------------------------|----------------------------------------------|----------------------------------------------|----------------------------|
| Patients with any treatment-related adverse event — no. (%) | 148 (24.5)                                   | 217 (36.2)                                   | 60 (9.9)                   |
| Fatal                                                       | 0                                            | 0                                            | 0                          |
| Recovered/resolved with sequelae                            | 0                                            | 0                                            | 0                          |
| Not recovered/not resolved                                  | 5 (0.8)                                      | 8 (1.3)                                      | 8 (1.3)                    |
| Recovering/resolving                                        | 8 (1.3)                                      | 9 (1.5)                                      | 9 (1.5)                    |
| Recovered/resolved                                          | 135 (22.4)                                   | 200 (33.4)                                   | 42 (6.9)                   |
| Unknown                                                     | 0                                            | 0                                            | 1 (0.2)                    |

Data for all patients who received at least 1 ensitrelvir or placebo dose are shown.

All treatment-related adverse events that were not resolved by day 28 (end of the follow-up period) were clinical laboratory test results, except 1 event of rash in the 250-mg ensitrelvir group (resolved after discontinuation of the trial).
