# Supplementary material for: Efficacy and Safety of 5-Day Oral Ensitrelvir for Patients With Mild to Moderate COVID-19: The SCORPIO-SR Randomized Clinical Trial
Source: PubMed Central journal article supplement — JAMA Netw Open. 2024 Feb 9;7(2):e2354991. doi: 10.1001/jamanetworkopen.2023.54991 (PMC10858401; doi:10.1001/jamanetworkopen.2023.54991), 2024-02-09
Supplement: jamanetwopen-e2354991-s003.pdf [file jamanetwopen-e2354991-s003.pdf]

## Data Sharing Statement

Yotsuyanagi. Efficacy and Safety of 5-Day Oral Ensitrelvir for Patients With Mild to Moderate COVID-19. *JAMA Netw Open*. Published February 09, 2024.

doi:10.1001/jamanetworkopen.2023.54991

### Data

**Data available:** Yes

**Data types:** Deidentified participant data

**How to access data:** Shionogi & Co, Ltd, is committed to disclosing the synopses and results of its clinical trials and sharing the clinical trial data with researchers on reasonable request.

For further details, please refer to the websites of Shionogi & Co, Ltd

(<https://www.shionogi.com/shionogi/global/en/company/policies/shionogi-group-clinical-trial-data-transparency-policy.html>) and Vivli (<https://vivli.org/>).

**When available:** With publication

### Supporting Documents

**Document types:** Informed consent form

**How to access documents:** I will respond to each request individually. Email address:

[takeki.uehara@shionogi.co.jp](mailto:takeki.uehara@shionogi.co.jp)

**When available:** With publication

### Additional Information

**Who can access the data:** Researchers whose proposed use of the data has been approved

**Types of analyses:** For a specified purpose

**Mechanisms of data availability:** After approval of a proposal
